# Supplementary material
Source: PubMed Central journal article supplement (PMC7459076)
Supplement: 11606_2020_5823_MOESM1_ESM.pdf [file 11606_2020_5823_MOESM1_ESM.pdf]

1  
2  
3  
4 459 **APPENDICES**  
5  
6  
7

8 **Supplemental Table 1:** Provider specialty codes and healthcare provider taxonomy codes.

| Type of provider                 | Medicare Specialty code                                                                                                                                                 | Label                                                                                                                                                                                                                                                                                                                                                                                                                                                               |
|----------------------------------|-------------------------------------------------------------------------------------------------------------------------------------------------------------------------|---------------------------------------------------------------------------------------------------------------------------------------------------------------------------------------------------------------------------------------------------------------------------------------------------------------------------------------------------------------------------------------------------------------------------------------------------------------------|
| Primary Care physician           | 01, 08, 11, 38                                                                                                                                                          | General practice, Family practice, Internal Medicine, Geriatric Medicine                                                                                                                                                                                                                                                                                                                                                                                            |
| Primary Care Nurse Practitioner  | 50<br>exclude<br>363LA2100X<br>363LC0200X<br>363LN0000X<br>363LN0005X<br>363LX0001X<br>363LX0106X<br>363LP0200X<br>363LP0222X<br>363LP1700X<br>363LP0808X<br>363LS0200X | Nurse practitioner<br>Nurse practitioner/acute care<br>Nurse practitioner/critical care medicine<br>Nurse practitioner/neonatal<br>Nurse practitioner/neonatal critical care<br>Nurse practitioner/obstetrics & gynecology<br>Nurse practitioner/occupational health<br>Nurse practitioner/pediatrics<br>Nurse practitioner/pediatrics critical care<br>Nurse practitioner/perinatal<br>Nurse practitioner/psychiatric & mental health<br>Nurse practitioner/school |
| Primary Care Physician Assistant | 97<br>exclude<br>363AS0400X                                                                                                                                             | Physician Assistant<br>Physician assistant/surgical                                                                                                                                                                                                                                                                                                                                                                                                                 |

30  
31  
32  
33  
34  
35  
36  
37  
38  
39  
40 460  
41  
42  
43  
44  
45  
46  
47  
48  
49  
50  
51  
52  
53  
54  
55  
56  
57  
58  
59  
60  
61  
62  
63  
64  
65

**Supplemental Table 2:** Flow chart for study cohorts

| Denominator<br>Primary care providers                                                                    | Provider type   |                    |               |                    |               |                    |
|----------------------------------------------------------------------------------------------------------|-----------------|--------------------|---------------|--------------------|---------------|--------------------|
|                                                                                                          | Primary Care MD |                    | NP            |                    | PA            |                    |
|                                                                                                          | N               | % of previous step | N             | % of previous step | N             | % of previous step |
| 1. Unique NPI numbers in 2015 Part D file from 20% Medicare sample                                       | 244,862         |                    | 121,949       |                    | 82,383        |                    |
| 2. Limited to primary care by taxonomy codes                                                             |                 |                    | 108,995       | 89.4               | 74,428        | 90.3               |
| 3. Those in 50 States and DC                                                                             | 241,674         | 98.7               | 108,885       | 99.9               | 74,324        | 99.9               |
| 4. Those wrote at least 50 prescriptions in a year <sup>a</sup>                                          | 177,666         | 73.5               | 56,848        | 52.2               | 34,820        | 46.8               |
| 5. Exclude those without any E&M services                                                                | 162,412         | 91.4               | 45,435        | 79.9               | 26,933        | 77.3               |
| 6. Those with <50% E&M service for ED                                                                    | 159,631         | 98.3               | 44,006        | 96.9               | 24,275        | 90.1               |
| <b>7. Those with at least 10 patients**</b>                                                              | <b>156,161</b>  | <b>97.8</b>        | <b>42,655</b> | <b>96.9</b>        | <b>23,873</b> | <b>98.3</b>        |
| <b>8. Those with at least 10 patients with completed Part D enrollment and survived after 4/1/2015**</b> | <b>155,335</b>  | <b>97.3</b>        | <b>42,309</b> | <b>96.1</b>        | <b>23,754</b> | <b>97.9</b>        |

a Using this cutoff, about 98% of providers prescribed medications to at least 10 Medicare patients in the study year.

\*\* Assessing the percent of patients receiving high dose opioid prescriptions

\*\*\* Assessing the percent of patients receiving prolong opioid prescriptions

MD: medical doctor; NP: nurse practitioner; PA: physician assistant; E&M evaluation and management; ER: emergency department; MME: morphine milligram equivalents.

14  
15  
16  
17  
18  
19  
20  
21  
22  
23  
24  
25  
26  
27  
28  
29  
30  
31  
32  
33  
34  
35  
36  
37  
38  
39  
40  
41  
42  
43  
44  
45  
46  
47  
48  
49  
50  
51  
52  
53  
54  
55  
56  
57  
58  
59  
60  
61  
62  
63  
64  
65

**Supplemental Table 3:** Nurse Practitioner and Physician Assistant prescriptive authority<sup>21-23</sup> requirements for controlled substance (Schedule II-V) prescribing in 2015

| <i><b>Nurse practitioner</b></i>  | <b>Legal requirements</b>                                                                       | <b>Schedule II prescribing allowed</b>                                                | <b>Schedule III-V Prescribing allowed</b> | <b>Can obtain DEA number</b> |
|-----------------------------------|-------------------------------------------------------------------------------------------------|---------------------------------------------------------------------------------------|-------------------------------------------|------------------------------|
| Alabama                           | Collaborating physician for professional oversight and direction                                | No                                                                                    | Yes                                       | No                           |
| Arkansas                          | Collaborating physician for professional oversight and direction                                | Limited to hydrocodone-containing products (with authorization from collaborating MD) | Yes                                       | Yes                          |
| Florida                           | N/A                                                                                             | No                                                                                    | No                                        | No                           |
| Georgia                           | Practice under a Nurse Protocol Agreement and prescribe as delegated by a physician or protocol | No                                                                                    | Yes                                       | No                           |
| Missouri                          | Collaborating physician for professional oversight and direction                                | Limited to hydrocodone-containing products (with authorization from collaborating MD) | Yes                                       | Yes <sup>a</sup>             |
| Oklahoma                          | Physician supervision required for prescriptive authority                                       | No                                                                                    | Yes, 30-day supply                        | Yes                          |
| South Carolina                    | May prescribe according to practice agreement/protocol in place                                 | No                                                                                    | Yes                                       | No                           |
| West Virginia                     | Collaborating physician for professional oversight and direction                                | No                                                                                    | Yes                                       | Yes                          |
| <i><b>Physician assistant</b></i> |                                                                                                 |                                                                                       |                                           |                              |
| Alabama                           | Must practice with a supervising physician                                                      | Additional permit required                                                            | Yes                                       | Yes                          |
| Arkansas                          | Must practice with a supervising physician                                                      | Limited to hydrocodone-containing products (with authorization from supervising MD)   | Yes                                       | Yes                          |
| Florida                           | Must practice with a supervising physician                                                      | No                                                                                    | Yes                                       | Yes                          |
| Georgia                           | Must practice with a supervising physician                                                      | No                                                                                    | Yes                                       | Yes                          |
| Iowa                              | Must practice with a supervising physician                                                      | May not prescribe depressants <sup>b</sup>                                            | Yes                                       | Yes                          |
| Kentucky                          | N/A                                                                                             | No                                                                                    | No                                        | No                           |
| Missouri                          | Must practice with a supervising physician                                                      | Limited to hydrocodone-containing products (with authorization from supervising MD)   | Yes                                       | Yes                          |
| West Virginia                     | Must practice with a supervising physician                                                      | No                                                                                    | Yes, 30-day supply                        | Yes                          |

467 a Prescriptions must include name of collaborating physician

14  
15  
16  
17  
18  
19  
20  
21  
22  
23  
24  
25  
26  
27  
28  
29  
30  
31  
32  
33  
34  
35  
36  
37  
38  
39  
40  
41  
42  
43  
44  
45  
46  
47  
48  
49  
50  
51  
52  
53  
54  
55  
56  
57  
58  
59  
60  
61  
62  
63  
64  
65

468  
469  
470

b Defined in the Iowa Code 2020, Chapter 124.206 to include amobarbital, glutethimide, pentobarbital, phencyclidine, secobarbital or the immediate precursors to any of the preceding.

**Supplemental Table 4.** Opioid prescribing pattern of primary care providers in the 559 primary care services areas, stratified by whether NP/PA were affiliated with primary care practices identified by social network analysis\*\*

|                                                                 | Primary care MD      |                       |                     | Primary care NP |                       |                  | Primary care PA  |                       |                  |
|-----------------------------------------------------------------|----------------------|-----------------------|---------------------|-----------------|-----------------------|------------------|------------------|-----------------------|------------------|
|                                                                 | Total                | Primary care practice |                     | Total           | Primary care practice |                  | Total            | Primary care practice |                  |
|                                                                 |                      | Yes                   | No <sup>a</sup>     |                 | Yes                   | No <sup>b</sup>  |                  | Yes                   | No <sup>b</sup>  |
| <b>% of patients who received any opioid</b>                    | N = 31,147           | N = 11,172            | N = 19,975          | N = 9,175       | N = 3,303             | N = 5,872        | N = 4,983        | N = 1,728             | N = 3,255        |
| Mean ± STD                                                      | 16.21 ± 11.22        | 16.90 ± 10.22         | 15.82 ± 11.72       | 14.20 ± 18.03   | 17.09 ± 19.58         | 12.57 ± 16.87    | 15.63 ± 19.91    | 14.88 ± 18.15         | 16.03 ± 20.77    |
| Median (Q1 – Q3)                                                | 14.63 (8.33 – 22.03) | 15.63 (9.76 – 22.24)  | 14.0 (7.69 – 21.74) | 8.33 (0 – 20.0) | 10.87 (2.63 – 23.81)  | 6.90 (0 – 18.52) | 9.32 (0 – 20.72) | 10.00 (2.44 – 19.35)  | 9.09 (0 – 21.67) |
| >50%                                                            | 1.07%                | 0.74%                 | 1.25%               | 5.21%           | 7.54%                 | 3.90%            | 7.59%            | 5.96%                 | 8.45%            |
| <b>% of patients who received high dose opioids<sup>c</sup></b> | N = 31,147           | N = 11,172            | N = 19,975          | N = 9,175       | N = 3,303             | N = 5,872        | N = 4,983        | N = 1,728             | N = 3,255        |
| Mean ± STD                                                      | 0.83 ± 2.66          | 0.82 ± 2.00           | 0.83 ± 2.96         | 0.99 ± 3.51     | 1.13 ± 3.40           | 0.91 ± 3.57      | 1.21 ± 4.72      | 1.28 ± 5.12           | 1.17 ± 4.50      |
| Median (Q1 – Q3)                                                | 0 (0 – 0.48)         | 0 (0 – 1.04)          | 0 (0 – 0)           | 0 (0 – 0)       | 0 (0 – 0)             | 0 (0 – 0)        | 0 (0 – 0)        | 0 (0 – 0)             | 0 (0 – 0)        |
| >10%                                                            | 0.92%                | 0.52%                 | 1.14%               | 2.32%           | 2.36%                 | 2.30%            | 3.03%            | 2.95%                 | 3.07%            |
| <b>% of patients who received long-term opioids<sup>d</sup></b> | N = 30,939           | N = 11,160            | N = 19,779          | N = 9,062       | N = 3,294             | N = 5,768        | N = 4,941        | N = 1,726             | N = 3,215        |
| Mean ± STD                                                      | 4.43 ± 6.33          | 4.88 ± 5.32           | 4.18 ± 6.83         | 3.16 ± 7.79     | 3.54 ± 8.02           | 2.94 ± 7.65      | 2.94 ± 8.27      | 3.25 ± 8.89           | 2.77 ± 7.91      |
| Median (Q1 – Q3)                                                | 2.50 (0 – 6.56)      | 3.61 (0 – 7.14)       | 1.47 (0 – 6.06)     | 0 (0 – 3.23)    | 0 (0 – 3.70)          | 0 (0 – 2.86)     | 0 (0 – 2.44)     | 0 (0 – 2.78)          | 0 (0 – 2.08)     |
| >20%                                                            | 2.61%                | 1.82%                 | 3.05%               | 3.41%           | 4.01%                 | 3.07%            | 3.22%            | 3.59%                 | 3.02%            |

<sup>a</sup>Based on Social Network Analysis, these primary care physicians were not affiliated with primary care practices. They may be primary care solo practitioners.

<sup>b</sup>Based on Social Network Analysis, these NPs/PAs were not affiliated with primary care practices. They may be either specialist NPs/PAs or primary care solo practitioners.

<sup>c</sup>Providers with at least 10 patients receiving any prescriptions in 2015.

<sup>d</sup>Providers with at least 10 patients who completed Part D enrolment and were survived after 4/1/2015 in order to measure whether they received opioids for more than 90 days.

MD, medical doctor; NP, nurse practitioner; PA, physician assistant; STD, standard deviation; Q, quartile

\*\* We identified primary care practice within each of the 20% randomly selected primary care service area (PCSA). A PCSA is an area defined by Dartmouth Atlas Healthcare for the measurement of primary care resources, utilization, and outcomes within small standardized areas based on zip codes.<sup>35</sup> We identified pairs of primary care providers in each PCSA who shared at least 30 patients, then used the Walktrap community finding algorithm to identify clusters of providers<sup>36-38</sup> in primary care practices.<sup>24-26</sup> Only clusters (primary care practices) in PCSAs with a modularity  $\geq 0.4$ , indicating a densely connected network were selected.<sup>39</sup> This methodology had positive predictive value of 84.4% for identifying MD and NP/PA pairs and good agreement in identifying primary care practices in a validation study.<sup>40</sup>

**Supplemental Table 5:** Characteristics associated with high frequency, high dose, and long-term opioid prescribing by nurse practitioners (NPs) and physician assistants (PAs) to Medicare Part D enrollees in 2015, estimated from logistic regression models

|                                                               | High frequency |           | High dose   |           | Long-term    |           |             |
|---------------------------------------------------------------|----------------|-----------|-------------|-----------|--------------|-----------|-------------|
|                                                               | OR             | 95% CI    | OR          | 95% CI    | OR           | 95% CI    |             |
| <b>Regulations allow Schedule II prescription<sup>a</sup></b> | No             | 1.00      | 1.00        |           | 1.00         |           |             |
|                                                               | Yes            | 28.20     | 19.67-40.44 | 70.09     | 29.13-168.61 | 46.87     | 25.84-84.99 |
| <b>Patient Characteristic (every 10% increase)</b>            |                |           |             |           |              |           |             |
| % Age older than 80 years                                     | 1.26           | 1.23-1.29 | 1.18        | 1.13-1.23 | 1.49         | 1.43-1.54 |             |
| % Female                                                      | 1.12           | 1.10-1.15 | 1.06        | 1.02-1.09 | 1.18         | 1.14-1.23 |             |
| % Minority                                                    | 0.86           | 0.84-0.88 | 0.84        | 0.81-0.86 | 0.87         | 0.85-0.90 |             |
| % Original entitlement as disabled                            | 1.62           | 1.58-1.66 | 1.98        | 1.91-2.06 | 2.54         | 2.44-2.63 |             |
| % Medicaid eligible                                           | 0.95           | 0.93-0.97 | 0.81        | 0.79-0.84 | 0.83         | 0.80-0.85 |             |
| % HMO enrollee                                                | 0.97           | 0.96-0.99 | 0.97        | 0.95-1.00 | 1.01         | 0.98-1.03 |             |
| Rurality (1-unit increase)                                    | 0.82           | 0.80-0.83 | 0.79        | 0.77-0.82 | 0.94         | 0.92-0.97 |             |
| PCP available per 10,000                                      | 1.01           | 1.01-1.02 | 1.02        | 1.01-1.03 | 0.98         | 0.97-0.99 |             |

<sup>a</sup>States that do not allow NPs to prescribe Schedule II opioids: Alabama, Arkansas, Florida, Georgia, Missouri, Oklahoma, South Carolina, West Virginia

States that do not allow PAs to prescribe Schedule II opioids: Alabama, Arkansas, Florida, Georgia, Iowa, Kentucky, Missouri, West Virginia.

HMO: health maintenance organization; PCP: primary care physician

**Supplemental Table 6.** Opioid prescription pattern by primary care providers, stratified by state regulation of NP/PA schedule II prescription authority (only for their patients who had Part A and B without HMO enrollment in 2014)

|                                      | <b>Primary care MD</b> |                                                                                  |                      | <b>Primary care NP</b> |                                                                         |              | <b>Primary care PA</b> |                                                                         |              |
|--------------------------------------|------------------------|----------------------------------------------------------------------------------|----------------------|------------------------|-------------------------------------------------------------------------|--------------|------------------------|-------------------------------------------------------------------------|--------------|
|                                      |                        | state regulation allows NP and PA to prescribe schedule II opioid <sup>a,b</sup> |                      |                        | state regulation allows NP to prescribe schedule II opioid <sup>a</sup> |              |                        | state regulation allows PA to prescribe schedule II opioid <sup>b</sup> |              |
| % of patients who received:          | Total                  | Yes                                                                              | No                   | Total                  | Yes                                                                     | No           | Total                  | Yes                                                                     | No           |
| <b>Any opioid</b>                    | N = 127,985            | N = 101,761                                                                      | N = 26,224           | N = 34,175             | N = 28,632                                                              | N = 5,543    | N = 19,569             | N = 17,012                                                              | N = 2,557    |
| <i>Mean ± STD</i>                    | 17.50±12.63            | 16.99±12.26                                                                      | 19.49±13.81          | 15.05±20.0             | 17.20±20.91                                                             | 3.93±7.80    | 16.31 ± 22.21          | 18.12 ± 22.95                                                           | 4.26 ± 10.18 |
| <i>Median (Q1 – Q3)</i>              | 15.79 (8.33 – 24.32)   | 15.38 (8.33 – 23.60)                                                             | 17.50 (9.52 – 26.86) | 8.33 (0 – 20.83)       | 10.34 (0 – 23.53)                                                       | 0 (0 – 5.00) | 8.33 (0 – 21.31)       | 10.00 (0 – 23.53)                                                       | 0 (0 – 4.17) |
| <b>&gt;50%</b>                       | 1.68%                  | 1.40%                                                                            | 2.76%                | 6.55%                  | 7.79%                                                                   | 0.14%        | 9.03%                  | 10.24%                                                                  | 1.00%        |
| <b>High dose opioids<sup>c</sup></b> | N = 127,985            | N = 101,761                                                                      | N = 26,224           | N = 34,175             | N = 28,632                                                              | N = 5,543    | N = 19,569             | N = 17,012                                                              | N = 2,557    |
| <i>Mean ± STD</i>                    | 0.94±2.94              | 0.94±2.86                                                                        | 0.91±3.25            | 1.17±4.47              | 1.39±4.84                                                               | 0.03±0.52    | 1.28 ± 4.97            | 1.45 ± 5.30                                                             | 0.10 ± 1.04  |
| <i>Median (Q1 – Q3)</i>              | 0 (0 - 0)              | 0 (0 - 0)                                                                        | 0 (0 - 0)            | 0 (0 – 0)              | 0 (0 – 0)                                                               | 0 (0 – 0)    | 0 (0 – 0)              | 0 (0 – 0)                                                               | 0 (0 – 0)    |
| <b>&gt;10%</b>                       | 1.23%                  | 1.23%                                                                            | 1.24%                | 3.05%                  | 3.63%                                                                   | <0.20%       | 3.54%                  | 4.03%                                                                   | <0.43%       |
| <b>Long-term opioids<sup>d</sup></b> | N = 127,680            | N = 101,518                                                                      | N = 26,162           | N = 34,077             | N = 28,549                                                              | N = 5,528    | N = 19,531             | N = 16,981                                                              | N = 2,550    |
| <i>Mean ± STD</i>                    | 5.27±7.36              | 5.04±6.99                                                                        | 6.14±8.61            | 3.74±9.49              | 4.35±10.21                                                              | 0.58±2.28    | 3.35 ± 9.63            | 3.75 ± 10.22                                                            | 0.65 ± 2.65  |
| <i>Median (Q1 – Q3)</i>              | 3.03 (0 – 7.94)        | 2.90 (0 – 7.69)                                                                  | 3.45 (0 – 9.09)      | 0 (0 – 3.57)           | 0 (0 – 4.76)                                                            | 0 (0 – 0)    | 0 (0 – 1.82)           | 0 (0 – 2.86)                                                            | 0 (0 – 0)    |
| <b>&gt;20%</b>                       | 4.01%                  | 3.48%                                                                            | 6.05%                | 4.50%                  | 5.34%                                                                   | <0.20%       | 4.20%                  | 4.79%                                                                   | <0.43%       |

<sup>a</sup>States which restricted NP authority to prescribe Schedule II opioids in 2015: Alabama, Arkansas, Florida, Georgia, Missouri, Oklahoma, South Carolina, West Virginia

<sup>b</sup>States which restricted PA authority to prescribe Schedule II opioids in 2015: Alabama, Arkansas, Florida, Georgia, Iowa, Kentucky, Missouri, West Virginia.

<sup>c</sup>Providers with at least 10 patients receiving any prescriptions in 2015.

<sup>d</sup>Providers with at least 10 patients who completed Part D enrolment and were survived after 4/1/2015 in order to measure whether they received opioids for more than 90 days.

MD, medical doctor; NP, nurse practitioner; PA, physician assistant; Rx, prescriptions; STD, standard deviation; Q, quartile.

14  
15  
16  
17  
18  
19  
20  
21  
22  
23  
24  
25  
26  
27  
28  
29  
30  
31  
32  
33  
34  
35  
36  
37  
38  
39  
40  
41  
42  
43  
44  
45  
46  
47  
48  
49  
50  
51  
52  
53  
54  
55  
56  
57  
58  
59  
60  
61  
62  
63  
64  
65

**Supplemental Table 7:** Characteristics associated with opioid overprescribing between types of provider within the same state, estimated from conditional logistic regression models (only for their patients who had Part A and B without HMO enrollment in 2014)

| Type of provider                                   | High frequency |           | High dose |           | Long-term |           |  |
|----------------------------------------------------|----------------|-----------|-----------|-----------|-----------|-----------|--|
|                                                    | OR             | 95% CI    | OR        | 95% CI    | OR        | 95% CI    |  |
| Primary care MD                                    | 1.00           |           | 1.00      |           | 1.00      |           |  |
| Primary care NP                                    | 2.26           | 2.11-2.41 | 1.29      | 1.17-1.41 | 0.51      | 0.48-0.55 |  |
| Primary care PA                                    | 4.36           | 4.06-4.69 | 1.62      | 1.36-1.79 | 0.60      | 0.55-0.65 |  |
| <b>Patient Characteristic (every 10% increase)</b> |                |           |           |           |           |           |  |
| % Age older than 80                                | 1.24           | 1.20-1.27 | 1.20      | 1.16-1.25 | 1.26      | 1.23-1.30 |  |
| % Female                                           | 1.16           | 1.14-1.19 | 1.03      | 1.00-1.07 | 1.07      | 1.06-1.11 |  |
| % Minority                                         | 0.94           | 0.93-0.96 | 0.92      | 0.90-0.95 | 0.95      | 0.93-0.96 |  |
| % Original entitlement as disabled                 | 1.86           | 1.82-1.91 | 2.22      | 2.14-2.29 | 2.10      | 2.05-2.15 |  |
| % Medicaid eligible                                | 0.94           | 0.92-0.96 | 0.78      | 0.76-0.80 | 0.92      | 0.90-0.94 |  |
| % HMO enrollee                                     | 0.99           | 0.98-1.01 | 1.02      | 1.00-1.04 | 1.08      | 1.06-1.09 |  |
| Rurality (1-unit increase)                         | 0.93           | 0.91-0.95 | 0.92      | 0.90-0.94 | 1.07      | 1.06-1.09 |  |
| PCP available per 10,000                           | 1.01           | 1.00-1.01 | 1.02      | 1.01-1.02 | 0.98      | 0.97-0.98 |  |
| % >=3 comorbidity                                  | 1.22           | 1.20-1.24 | 1.15      | 1.13-1.18 | 1.03      | 1.01-1.04 |  |

MD: medical doctor; NP: nurse practitioner; PA: physician assistant; HMO, health maintenance organization; PCP: primary care physician

496  
497
